# Supplementary material for: Theoretical Study of the Structural, Optoelectronic, and Reactivity Properties of N-[5′-Methyl-3′-Isoxasolyl]-N-[(E)-1-(-2-)]Methylidene] Amine and Some of Its Fe2+, Co2+, Ni2+, Cu2+, and Zn2+ Complexes for OLED and OFET Applications
Source: Hindawi journal article supplement (doi:10.1155/2022/3528170), 2022-07-22
Supplement: f1 [file 3528170.f1.docx]

Theoretical study of the structural, optoelectronic, and reactivity properties of N-[5’-methyl-3’-isoxasolyl]-N-[(E)-1-(-2-Thiophene)]methylidene]amine and some of its Fe2+, Co2+, Ni2+, Cu2+ and Zn2+ complexes for OLED and OFET applications.

**Hilaire Tendongmo1, StanleyNumbonui Tasheh1, Didier Aymard Fouegue Tamafo2,** Fritzgerald Kogge Bine1**, Julius Numbonui Ghogomu1, 3**

1Research Unit of Noxious Chemistry and Environmental Engineering, Department of Chemistry, Faculty of Science, University of Dschang, P.O. Box 67, Dschang-Cameroon

2Department of Chemistry, Higher Teacher Training College Bertoua, University of Bertoua, P.O. Box 652, Cameroon

3 Department of Chemistry, Faculty of Science, The University of Bamenda, P.O. Box 39, Bambili-Bamenda, Cameroon

***Corresponding author:** [ghogsjuju@hotmail.com](mailto:ghogsjuju@hotmail.com)


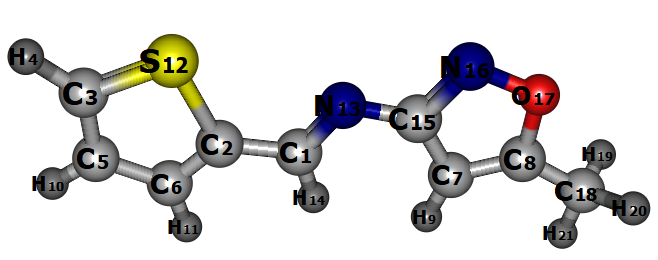

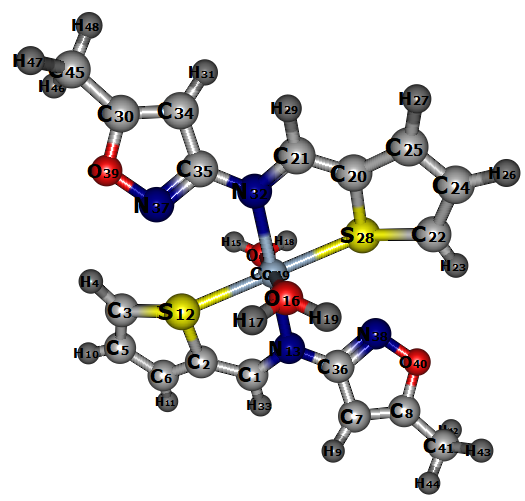

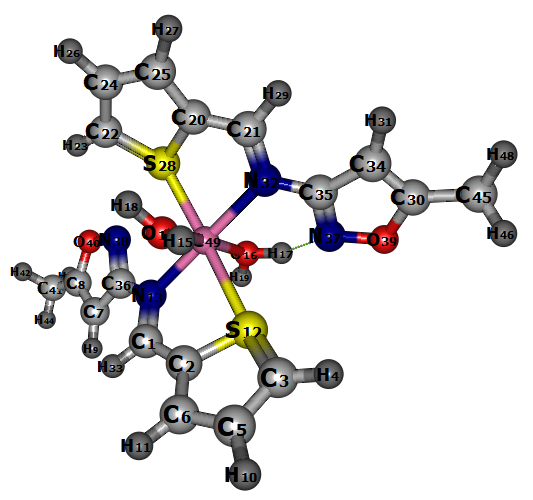


**A**


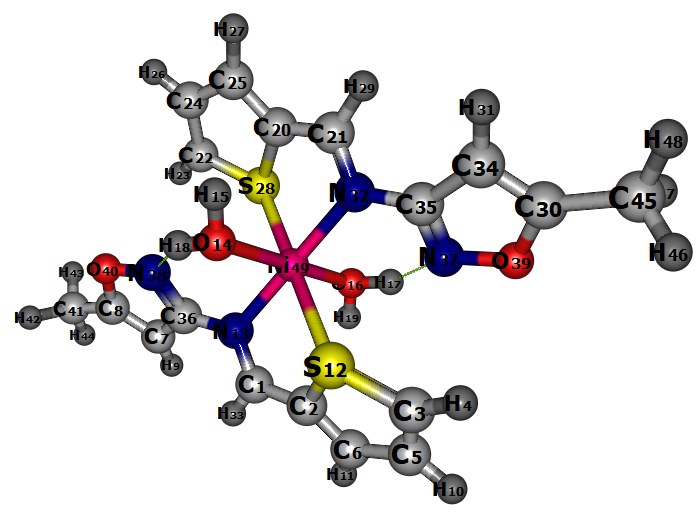


**L**

**B**

**C**


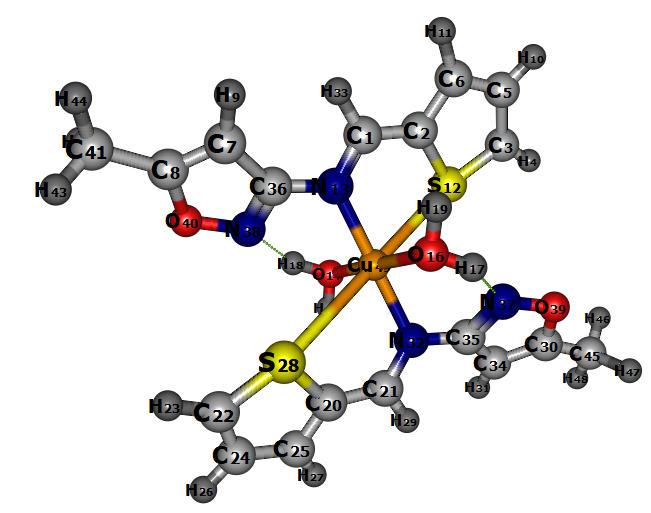


**D**


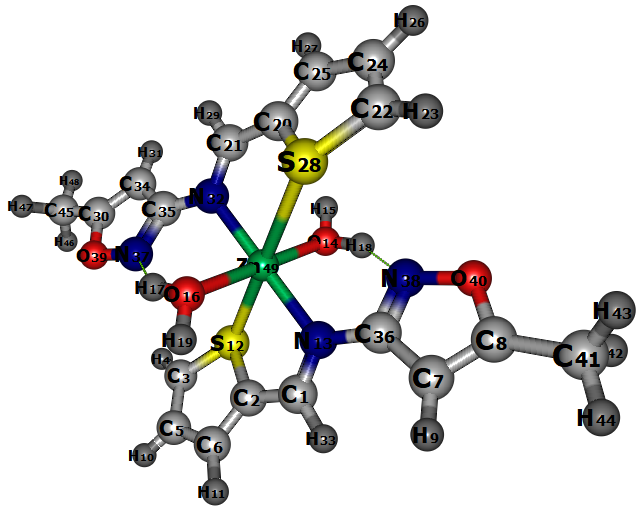


**E**

**Figure S1.** Optimized geometries of molecules studied at the M06-D3ZERO/def2-TZVP level of theory in gas phase.

**2+ (A)**

**2+ (B)**

**2+ (C)**

**2+ (E)**

**2+ (D)**


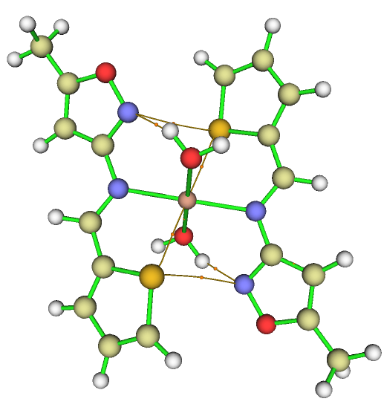

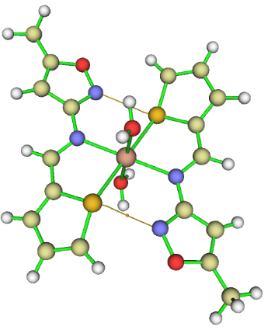

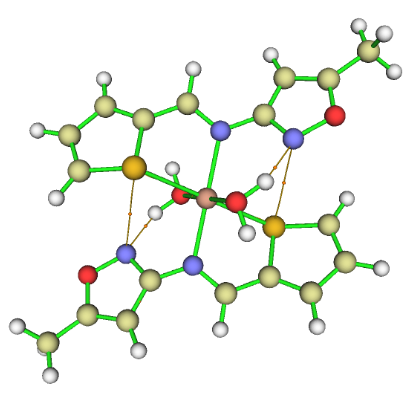

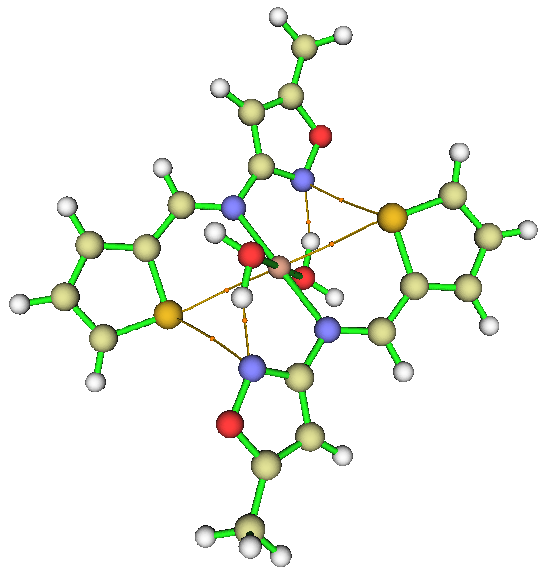

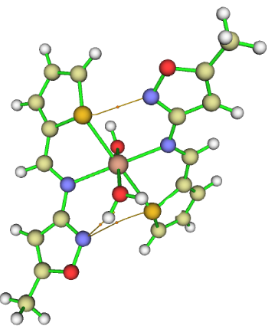


**Figure S2.** Molecular graphs of all studied complexes where Red, Blue, Yellow, Green and Grey spheres are respectively O, N, S, C and H atoms bond paths.

**Figure S3.** Simulated UV-visible absorption spectra of title compounds with the calculated data at PBE0/D3BJ/ma-def2-TZVP/def2/J level of theory in the gas phase.

Table S1. Cartesian coordinates of the gas phase optimised geometry of **L**

C 1.48043000 2.74642200 0.01176600

C 0.18419900 3.30211300 0.01309500

C -2.33410200 3.42133000 -0.01582000

H -3.37944500 3.14336500 -0.03226600

C -1.72457100 4.64880000 0.01333600

C -0.29965800 4.59120900 0.02936400

C 4.20024900 1.68491100 -0.03627200

C 5.16459800 0.71690900 -0.00579600

H 4.37789500 2.74764800 -0.07980800

H -2.28704600 5.57416800 0.02279400

H 0.34022600 5.46681900 0.05048200

S -1.14128200 2.12824500 -0.02256000

N 1.63952900 1.43876100 -0.02150100

H 2.33647400 3.42104100 0.04236800

C 2.96536500 0.97705600 -0.00820800

N 3.14702700 -0.33996800 0.03590100

O 4.54659200 -0.51836000 0.03835900

C 6.63639500 0.72518400 -0.00988800

H 7.03213900 0.25830800 0.89900200

H 7.02794400 0.16246100 -0.86442200

H 7.01263400 1.74887800 -0.06584000

Table S2. Cartesian coordinates of the gas phase optimised geometry of **Complex A**

C -1.57805200873648 -2.40566289260419 0.56216891655109

C -0.30737549651194 -2.93216265942967 0.92286925996893

C 2.14886161230928 -3.19815012879756 1.27441269741733

H 3.23018766407999 -3.13626846692560 1.18642926290726

C 1.40129753886377 -4.06311188223555 2.04376690161584

C 0.00455499540747 -3.92094909610188 1.84587500478798

C -4.14300183241459 -1.60549171886854 -0.74636701752577

C -5.06741178778542 -0.67545516013313 -1.14653704110450

H -4.28205737324999 -2.67951523702061 -0.70570186090052

H 1.85021884132412 -4.79220275618201 2.71638028898472

H -0.74936474387219 -4.50080309945417 2.37692514215731

S 1.14742461954104 -2.23600338937661 0.24428280431228

N -1.70809210039835 -1.23889900169650 -0.02441676125019

O -0.01865221601243 0.10782310788924 2.09020516877456

H 0.73065676418220 -0.17196476348429 2.64548200293030

O 0.30269147512304 -0.21578069705927 -2.11234271985863

H 1.31636671690126 -0.29405267130433 -2.21145858858958

H -0.53723188923270 0.75441762258471 2.60233883870227

H -0.14809625946560 -0.85001021367873 -2.69703113573345

C 0.26882916471551 3.07674589697515 0.71009645957294

C 1.56564528024743 2.59939944131898 0.36820312301105

C -2.21455709909951 3.13724647293474 0.95181976839230

H -3.28001595931994 2.97857589395190 0.81405042204093

C -1.57101769297290 4.06034782014184 1.74824632000221

C -0.15538613155201 4.03482649405054 1.61739803935319

H -2.10717499729467 4.74880133487391 2.39980105613748

H 0.52074385647380 4.66841378622023 2.19045274711785

S -1.09876689698065 2.27540736578740 -0.04497131724042

H 2.43669475840538 3.24359631163720 0.54119326347293

C 4.97602269476231 0.68080772099008 -1.42235186610103

H 4.62262641002537 2.28217020724070 0.04075834029839

N 1.69192890822851 1.41082935402187 -0.17435186626026

H -2.46517706329094 -2.99856063781995 0.81740965082803

C 4.24238329649265 1.48044131056045 -0.58112547308664

C 2.91103195147601 1.00459832375997 -0.71880345334563

C -2.97938285942652 -0.83798893322862 -0.45765188522441

N 2.85169849470717 -0.01337964629776 -1.57793674189521

N -3.17877095701598 0.45968913930318 -0.67326677835180

O 4.14210139117583 -0.21633375478045 -2.02919483308160

O -4.49427981388694 0.56444130797909 -1.10019989718402

C -6.47350117425732 -0.74809362561106 -1.60007200795524

H -7.12708423272740 -0.16862160844889 -0.93202357453789

H -6.57694917965827 -0.32970381253162 -2.61154105118719

H -6.81402075013387 -1.78912697494469 -1.61042863322361

C 6.40829424185299 0.60864703887426 -1.78247087089395

H 6.81594246412458 -0.38926881094350 -1.56643838238235

H 6.54398105237943 0.79687506793405 -2.85753674277416

H 6.97739591479170 1.35550766080788 -1.21858802214916

Fe -0.03544959229423 0.07474295912179 -0.10520695749998

Table S3. Cartesian coordinates of the gas phase optimised geometry of **Complex B**

C -1.47635884036825 -2.59450535945832 0.05673163122488

C -0.18660900822924 -3.16001291174565 -0.05966984487220

C 2.29317115926936 -3.34064018127424 -0.14187291406940

H 3.34782877751278 -3.13871529294126 -0.30160849760039

C 1.68256113711433 -4.51266880586490 0.25475292864775

C 0.27059978532930 -4.42045416988483 0.31179172200828

C -4.21244881704386 -1.53502892387091 -0.26145901190864

C -5.19894893547164 -0.61612283358280 -0.01788254142711

H -4.34671338155288 -2.54204400061812 -0.63866829852198

H 2.24458850699728 -5.41452098571638 0.49215745559285

H -0.38296614814472 -5.22659610825592 0.64299850792017

S 1.13325536642326 -2.12599792646369 -0.54063469503858

N -1.67459641407195 -1.29280041166005 -0.00262395522288

O 0.22179148984452 -0.39085982733294 2.07528485841756

H 1.05811276014732 -0.75176798014046 2.42092049465935

O -0.21883016735080 0.39041976828753 -2.07221153618893

H 0.13089156363435 -0.22752451799488 -2.74053263515470

H -0.12870242544371 0.22418473165220 2.74584024508871

H -1.05500974073294 0.75041350234174 -2.41914036305322

C 0.18502126453493 3.15824809289601 0.04277196631647

C 1.47611063749549 2.59439546143927 -0.06774758673227

C -2.29499222173841 3.33333338674875 0.12798251107992

H -3.34872189678731 3.13127739429619 0.29359404792379

C -1.68842035498411 4.50158118168268 -0.28541958173970

C -0.27620451357353 4.41241276265295 -0.34411187790412

H -2.25328407223620 5.39885606192836 -0.53322122562765

H 0.37451449241421 5.21593198061164 -0.68709741719488

S -1.13101805185069 2.12717114638522 0.54104325788394

H 2.32012090232823 3.26757381251610 -0.25935473669382

C 5.20134328787911 0.62198318835505 0.03934755959225

H 4.34498675831578 2.55534251815519 0.63038419097300

N 1.67624127819529 1.29368960039973 0.00467046888522

H -2.32137173447420 -3.26798037233809 0.24281127658948

C 4.21300319728414 1.54300087385063 0.26689887008250

C 3.00595623015564 0.84879864401287 -0.03958354130993

C -3.00363905012745 -0.84668394062690 0.05119464680071

N 3.24561365729689 -0.40146869087300 -0.41981780808569

N -3.24051712801694 0.39823641983158 0.45018490207653

O 4.62617343031248 -0.54755605463035 -0.37313671986955

O -4.62107249147279 0.54671379477492 0.40948980514844

C -6.67446798994560 -0.63482062693537 -0.12107578091573

H -7.13259661683901 -0.45912705191292 0.86316185879700

H -7.02893238893324 0.15456593877683 -0.79917962935084

H -7.01402377354455 -1.60527542592785 -0.49892653598095

C 6.67649730412556 0.64392647012444 0.14692925698387

H 7.02959802710006 -0.13494553358160 0.83778950982882

H 7.13800099528268 0.45421359007616 -0.83311714857904

H 7.01375656710572 1.62024703521567 0.51148671734613

Co 0.00058758683530 0.00031057661977 0.00229519317458

Table S4. Cartesian coordinates of the gas phase optimised geometry of **Complex C**

C -1.40669686564016 -2.57872711770341 -0.02891935883649

C -0.07122531310977 -3.05782320912607 0.10854607129814

C 2.37430044469004 -3.05738406009677 0.58257667393446

H 3.36699951966485 -2.83830767395237 0.96499186281155

C 1.96809957420510 -4.16126246763867 -0.13457338507251

C 0.57204990195553 -4.17082214417847 -0.40308978677887

C -4.19488557865914 -1.28701207018458 -0.20602129229895

C -5.09537765502395 -0.38922950913187 0.31228969131373

H -4.41818226962806 -2.14551969406473 -0.82852503576396

H 2.65015633247207 -4.95454264867018 -0.43619131034590

H 0.06531582765852 -4.94844027368506 -0.97371370051216

S 1.04687115846821 -2.04905987842341 1.01946594306128

N -1.63116635373604 -1.29649260815213 0.10082422026447

O -0.57412532736896 0.62019962258292 1.89672858585021

H -0.23582543736951 1.46556094921785 2.24297523196517

O 0.57385073672595 -0.62051603837321 -1.89608750679756

H 1.57710535150776 -0.70557922237148 -1.81329028264785

H -1.57736070467589 0.70547828371193 1.81395516111762

H 0.23571939976506 -1.46609819236392 -2.24196377167934

C 0.07105304719512 3.05777859917562 -0.10821093116131

C 1.40652848908691 2.57873025482066 0.02927640877753

C -2.37451468412250 3.05711375251834 -0.58198921503476

H -3.36726834872545 2.83788834004277 -0.96419042806167

C -1.96831804962117 4.16111419898432 0.13496937790850

C -0.57223095500785 4.17081152939061 0.40331947387475

H -2.65040024847707 4.95437433266601 0.43658003161738

H -0.06549158365227 4.94853062340403 0.97380239648423

S -1.04707984215321 2.04878656361735 -1.01888511445637

H 2.22598293647329 3.28859783419972 0.19649234813677

C 5.09518817161336 0.38911502553326 -0.31247571700830

H 4.41834151677993 2.14567053253600 0.82809664795505

N 1.63105819307441 1.29652306529668 -0.10053229077253

H -2.22619539990621 -3.28854463419400 -0.19610056970136

C 4.19482669802065 1.28695904564950 0.20595028090137

C 2.93496991007767 0.81054513738015 -0.24374503906570

C -2.93514052810449 -0.81060737261659 0.24401224088227

N 3.06189257986604 -0.29275085503278 -0.97488795610982

N -3.06226948671395 0.29247836459742 0.97541544319482

O 4.41829449159365 -0.56127102217684 -1.02694215573710

O -4.41869700636463 0.56097568169775 1.02717669162230

C -6.56758077493043 -0.26152994764570 0.25534355968092

H -6.99966306979837 -0.34382016854583 1.26347159351224

H -6.86196915822802 0.71559359773354 -0.15332616577459

H -6.99007159313392 -1.05166562121908 -0.37468266501348

C 6.56741800881460 0.26144960291236 -0.25599062423136

H 6.86191506253667 -0.71544689283101 0.15314840779641

H 6.99915870415172 0.34314328863283 -1.26430846105708

H 6.99014528946000 1.05192595475508 0.37344796101469

Ni -0.00006511170607 -0.00001085867862 0.00027645894317

Table S5. Cartesian coordinates of the gas phase optimised geometry of **Complex D**

C -1.21208896354305 -2.72297072020861 0.01754117792738

C 0.05500429246295 -3.34452715416653 0.09315579072241

C 2.41922050153774 -3.94328208930275 0.51705097684190

H 3.46336489256428 -3.93555291464301 0.82012081168118

C 1.69857467785420 -5.00198747176744 -0.01280529951447

C 0.35205936170652 -4.67307915611350 -0.23955875234668

C -3.98104227045081 -1.43744215114272 -0.23209023488085

C -4.90853595315932 -0.56344837075237 0.28131375824762

H -4.17354361119262 -2.27819664876518 -0.88808684485471

H 2.13571147085702 -5.97966669658390 -0.20524854974873

H -0.39091964087751 -5.36312748950686 -0.63801302618976

S 1.46437604313661 -2.54061313816668 0.74304955951592

N -1.42734568029901 -1.43099116068737 0.13566465292071

O -0.49254989189860 0.56861009418918 1.86205216105978

H -0.19147015723530 1.45930594289364 2.12302518357033

O 0.48085874356472 -0.56513056699204 -1.87059179134769

H 1.50600895253085 -0.58642876193661 -1.81350703037383

H -1.51713486068768 0.59018610430891 1.80063300587645

H 0.17864803458650 -1.45423303087799 -2.13542150658873

C -0.05006986736335 3.34952960010855 -0.07999215246363

C 1.21396829951531 2.72100234893788 -0.01075543833987

C -2.41009577583275 3.96766325720727 -0.49870061161735

H -3.45436271299915 3.96912291773779 -0.80153498683391

C -1.68233135095099 5.01734143303481 0.03947926243113

C -0.33812756429787 4.67759687416014 0.26323963054684

H -2.11289233456547 5.99641163382789 0.23951888330244

H 0.40967992016536 5.35941971071752 0.66680103453563

S -1.46507884408901 2.56020427675251 -0.73551555479063

H 2.08202863580702 3.38028952712128 0.12012379867213

C 4.90246803814857 0.55302357954733 -0.29692829388262

H 4.17358750161903 2.26032199801531 0.88700583260187

N 1.42366946482055 1.42897307988494 -0.13935838328493

H -2.07715409576208 -3.38706356255579 -0.10889183935154

C 3.97793512315314 1.42526436147378 0.22469750760241

C 2.73745375192377 0.95666264165775 -0.28146857796466

C -2.74256837525204 -0.96148420441346 0.27184574856184

N 2.90165096404951 -0.11552809273829 -1.04806813507906

N -2.91043248764495 0.11686859135459 1.02920392246034

O 4.25910014626670 -0.37822066706305 -1.06337329402179

O -4.26875879182947 0.37566523109468 1.04086431447967

C -6.37930061089271 -0.45120970171023 0.17764747508751

H -6.84389631881450 -0.56725682900539 1.16787871259045

H -6.67054012693400 0.53419316955319 -0.21290082609005

H -6.77056730270473 -1.22752363861903 -0.48860840424765

C 6.37286042100206 0.43465030166875 -0.19493780909267

H 6.65984119288024 -0.54386778289820 0.21589538295364

H 6.83538994781820 0.52705394199348 -1.18848321284706

H 6.77015199505142 1.22224513791487 0.45428771998098

Cu -0.00295478374528 -0.00006375453903 -0.00279574841771

Table S6. Cartesian coordinates of the gas phase optimised geometry of **Complex E**

C -1.35117511017146 -2.67271923068189 0.00336901791917

C -0.04296050811997 -3.21144822556705 0.12577168476294

C 2.38242459022473 -3.48386894714058 0.58636788231507

H 3.39656013772260 -3.36649381204482 0.95865970705061

C 1.85658307455144 -4.54316810501626 -0.12770473564016

C 0.47412352112702 -4.40166505265085 -0.37989355554024

C -4.14469353041029 -1.42532874496345 -0.13172555531355

C -5.05044905243222 -0.49995514042945 0.32448025792862

H -4.36644369457951 -2.32673761065931 -0.69073094843977

H 2.45050626842309 -5.40173663542999 -0.43554144738933

H -0.12610835204728 -5.12575739466966 -0.92983796364759

S 1.18635285976119 -2.32243012404981 1.00000385175838

N -1.57854248806181 -1.38895889481787 0.14897992104138

O -0.58994840864892 0.63711445245944 1.92318224812603

H -0.27153078787202 1.45245224409633 2.34900848619753

O 0.56768618184916 -0.63312903052182 -1.92173447241236

H 1.57234880749440 -0.70099616232085 -1.83361320110600

H -1.59395738259808 0.70091101114493 1.82442503678330

H 0.24116541334056 -1.44195657961797 -2.35360456066441

C 0.04903460250905 3.21334738699855 -0.10227805189408

C 1.35259170748729 2.66301549224197 0.01138915320348

C -2.37166418603414 3.52391309312170 -0.55750780668743

H -3.38839800417419 3.42295291280646 -0.92766560655939

C -1.82921668654955 4.57346450512718 0.15961824154654

C -0.44919071637749 4.41045098760314 0.40823513575194

H -2.40994442592256 5.43961882514213 0.47123713750063

H 0.16349649004125 5.12411634101051 0.95805031204410

S -1.19578306684136 2.34426776433707 -0.97387993579336

H 2.18948712234455 3.34819240585529 0.19666063533958

C 5.04214152455417 0.48332204842513 -0.35002902525864

H 4.36986843578074 2.30430847618938 0.68313001199956

N 1.57330654225096 1.37847397348570 -0.14148905973324

H -2.18268418453919 -3.36403928104319 -0.18325566883246

C 4.14182115771837 1.40755369974989 0.11920684928026

C 2.87979481923495 0.89685152172456 -0.28363980148543

C -2.88687824757238 -0.90945539833876 0.27770313505070

N 3.00775863328872 -0.24978272708216 -0.94614200823673

N -3.02219520906027 0.24176280627865 0.93068160325842

O 4.36545591231982 -0.51445983652921 -0.99547171654424

O -4.38055870276656 0.50401415003637 0.96755654792610

C -6.52349098952357 -0.38761966308911 0.26097005118401

H -6.95252033147294 -0.37363608985168 1.27352241186194

H -6.82442353668742 0.54332450803536 -0.24054614477954

H -6.94282468790226 -1.23729925180651 -0.28846034917433

C 6.51545780901715 0.36792413311579 -0.29928666017135

H 6.81868488855874 -0.57342903384093 0.18084439133126

H 6.93701971458258 0.37393392668091 -1.31510792715690

H 6.94013207255058 1.20590235074167 0.26385942432902

Zn 0.00165000363237 -0.00639804424490 0.00666306696996

**Table S7.** Computed values of the condensed Fukui functions (, ) and the dual descriptor (Δfk) in a.u. for ligand, complexes A and B.

| L | | | | A | | | B | | |
| --- | --- | --- | --- | --- | --- | --- | --- | --- | --- |
| Atomic sites |  |  |  |  |  |  |  |  |  |
| C1 | -0.024 | 0.014 | -0.038 | 0.013 | -0.016 | -0.028 | -0.007 | -0.014 | -0.007 |
| C21 | / | / | / | 0.010 | -0.101 | -0.111 | 0.007 | -0.121 | -0.128 |
| N13 | -0.023 | 0.159 | 0.182 | -0.046 | 0.112 | 0.158 | -0.046 | 0.112 | 0.158 |
| N32 | / | / | / | -0.036 | 0.123 | 0.158 | 0.01 | 0.137 | 0.125 |
| S12 | 0.037 | -0.074 | -0.110 | -0.000 | -0.121 | -0.121 | 0.027 | -0.129 | -0.156 |
| S28 | / | / | / | 0.006 | -0.119 | -0.124 | 0.023 | -0.129 | -0.152 |
| N37 | -0.009 | 0.126 | 0.135 | -0.025 | 0.083 | 0.108 | 0.026 | 0.117 | 0.091 |
| N38 | / | / | / | -0.012 | 0.095 | 0.106 | 0.002 | 0.117 | 0.114 |
| O39 | -0.007 | 0.056 | 0.062 | -0.026 | 0.015 | 0.041 | 0.018 | 0.054 | 0.035 |
| O40 | / | / | / | -0.021 | 0.019 | 0.040 | 0.010 | 0.054 | 0.044 |
| O14 | / | / | / | -0.031 | 0.161 | 0.191 | -0.017 | 0.185 | 0.202 |
| O16 | / | / | / | -0.025 | 0.165 | 0.190 | -0.008 | 0.185 | 0.193 |
| H15 | / | / | / | 0.016 | -0.196 | -0.212 | -0.066 | -0.213 | -0.147 |
| H18 | / | / | / | 0.021 | -0.192 | -0.213 | -0.004 | -0.213 | -0.209 |
| H17 | / | / | / | 0.070 | -0.142 | -0.212 | 0.002 | -0.213 | 0.215 |
| H19 | / | / | / | 0.010 | -0.202 | -0.212 | -0.040 | -0.213 | -0.172 |

Table S8. Computed values of the condensed Fukui functions (, ) and the dual descriptor (Δfk) in a.u. for complexes C, D and E.

| C | | | | D | | | E | | |
| --- | --- | --- | --- | --- | --- | --- | --- | --- | --- |
| Atomic sites |  |  |  |  |  |  |  |  |  |
| C1 | -0.002 | -0.0002 | 0.002 | -0.008 | -0.009 | -0.001 | 0.007 | -0.002 | -0.009 |
| C21 | -0.005 | -0.126 | -0.121 | -0.016 | -0.121 | -0.106 | -0.027 | -0.122 | -0.095 |
| N13 | -0.005 | 0.118 | 0.122 | -0.009 | 0.124 | 0.133 | -0.004 | 0.137 | 0.141 |
| N32 | -0.007 | 0.118 | 0.124 | -0.011 | 0.124 | 0.135 | -0.064 | 0.137 | 0.201 |
| S12 | -0.009 | -0.169 | -0.160 | -0.006 | -0.138 | -0.133 | -0.020 | -0.137 | -0.116 |
| S28 | -0.009 | -0.169 | -0.160 | -0.009 | -0.138 | -0.129 | -0.022 | -0.136 | -0.114 |
| N37 | -0.022 | 0.085 | 0.107 | -0.047 | 0.081 | 0.128 | -0.009 | 0.091 | 0.100 |
| N38 | -0.020 | 0.085 | 0.105 | -0.024 | 0.081 | 0.105 | -0.016 | 0.091 | 0.107 |
| O39 | 0.005 | 0.045 | 0.040 | -0.005 | 0.043 | 0.048 | -0.004 | 0.047 | 0.051 |
| O40 | 0.007 | 0.045 | 0.038 | 0.005 | 0.043 | 0.039 | 0.016 | 0.047 | 0.031 |
| O14 | 0.014 | 0.210 | 0.196 | 0.028 | 0.195 | 0.167 | 0.050 | 0.229 | 0.179 |
| O16 | 0.015 | 0.210 | 0.196 | 0.029 | 0.195 | 0.166 | 0.029 | 0.229 | 0.199 |
| H15 | 0.021 | 0.021 | 0.021 | 0.024 | -0.191 | -0.215 | 0.023 | -0.192 | -0.215 |
| H18 | 0.018 | -0.137 | -0.154 | 0.040 | -0.136 | -0.176 | 0.0631 | -0.134 | -0.197 |
| H17 | 0.021 | -0.137 | -0.158 | 0.086 | -0.136 | -0.222 | 0.085 | -0.134 | -0.219 |
| H19 | 0.022 | -0.188 | -0.210 | 0.019 | 0.192 | -0.210 | -0.048 | -0.193 | -0.145 |
